# Supplementary material
Source: bioRxiv or medRxiv preprint supplement (https://www.biorxiv.org/content/biorxiv/early/2020/12/03/2020.12.02.409177.1/DC1/embed/media-1.pdf)
Supplement: Supplementary file [file media-1.pdf]

1 **Supplementary Figures**

2

Supplementary Figure 1\_Related to Figure 1.

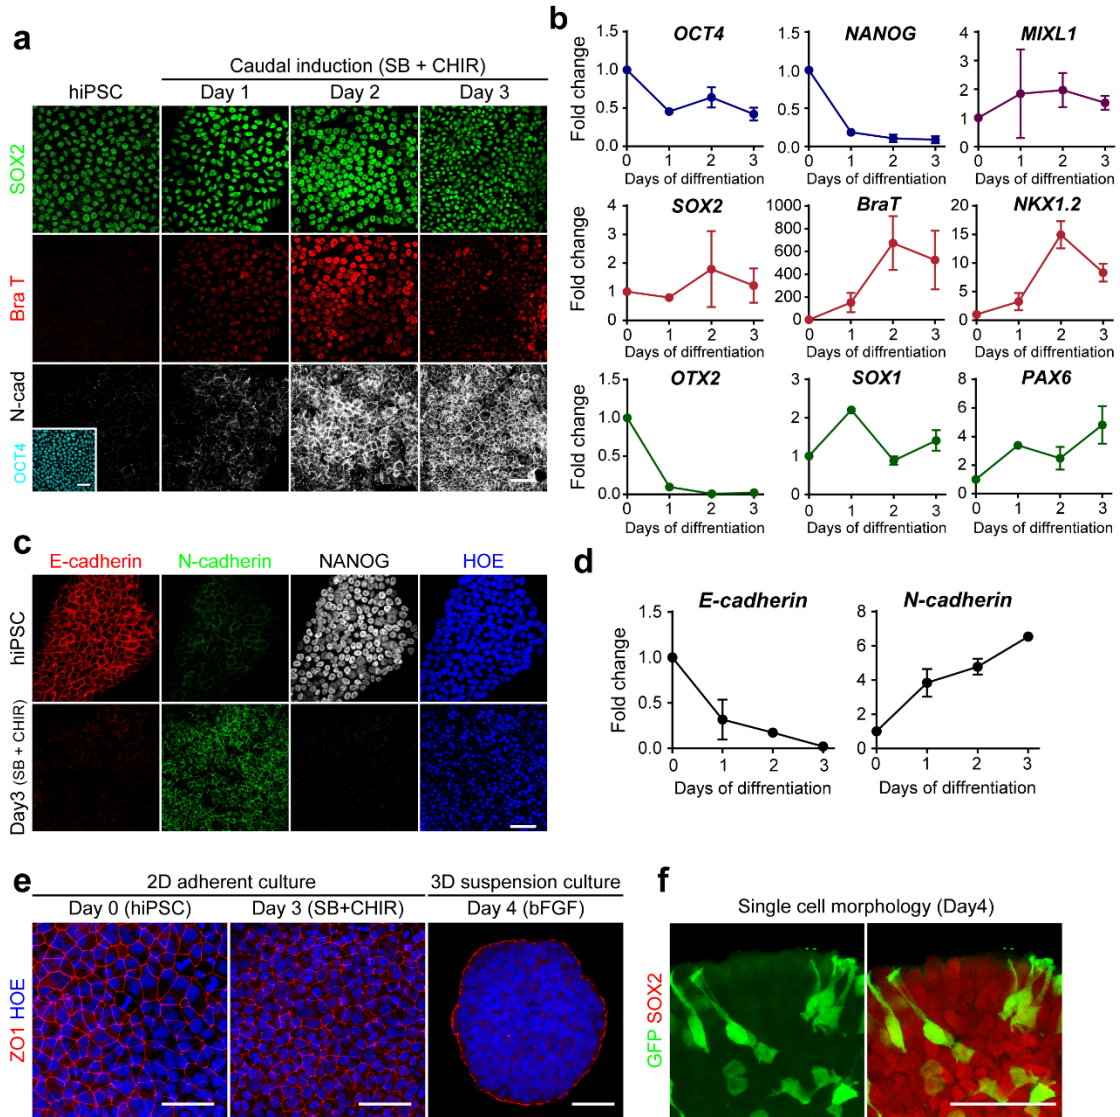

3

4 **Supplementary Fig. 1 (related to Fig. 1). Generation of caudal NSCs from hiPSCs in 2D**

5 **a.** Caudal induction (SB + CHIR) of hiPSCs on 2D culture showed transient induction of the  
6 NMP marker BraT and subsequent downregulation of BraT, leading to the conversion of

1

7 hiPSCs into N-cad positive neural stem cells. **b.** Real-time PCR profiles of gene expression for  
8 pluripotency marker (OCT4 and NANOG), mesendoderm (MIXL1), neuromesoderm (SOX2,  
9 BraT, and NKX1.2), neuroectoderm (SOX1 and PAX6), and rostral neuroectoderm (OTX2). **c.**  
10 The E- to N-cadherin switch was present during 2D induction. Immunofluorescence analysis  
11 of E-cadherin (red), N-cadherin (green), and Nanog (white). Nuclei were counterstained with  
12 Hoechst (blue). **d.** Relative expression of the E- and N- cadherin mRNAs depending on the  
13 days of differentiation. **e.** The maintenance of apical polarity from 2D to 3D culture. During  
14 the 3D conversion process, surface neuroepithelia cells (NE) re-established their polarity  
15 within 24 hours. Apical polarity was visualized with ZO1 immunolabeling (red). Nuclei were  
16 counterstained with Hoechst (blue). **f.** The pseudostratified morphology of NE cells on day 4  
17 (bFGF, day1). Note that the internal neural stem cells (SOX2+) exhibit distinct cell morphology.  
18 Cell morphologies was visualized with a small fraction of GFP-labeled cells initially mixed  
19 with non-labeled hPSCs. All scale bars, 50  $\mu$ m.

20

21

22

23

24

25

26

Supplementary Figure 2\_Related to Figure 1.

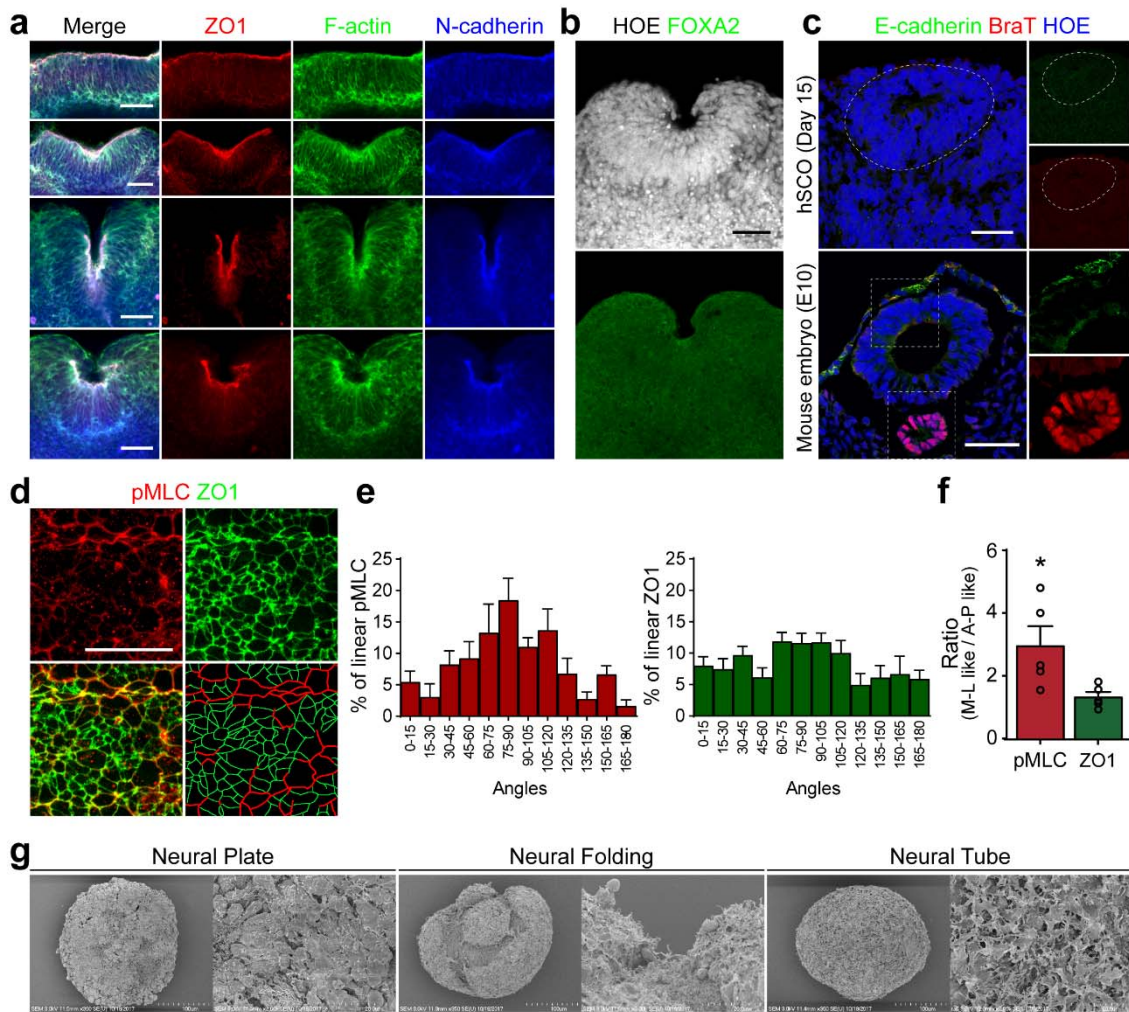

27

28 **Supplementary Fig. 2 (related to Fig. 1). hSCOs mimicking neurulation morphogenesis**

29 *in vivo*

30 **a.** Morphology of neural folding at different stages of development. **b.** Immunofluorescence  
 31 staining of the floor plate marker FOXA2 (green) showed the absence of floor plate cells at the  
 32 neural groove. **c.** Absence of non-neural tissue components in the hSCOs. The non-neural  
 33 epithelium was visualized with E-cadherin (green) and the mesodermal tissue was visualized

34 with BraT (red) staining. Developing mouse neural tube (bottom) is shown as a control. **d.**  
35 High-magnification image of the planar cell polarity (PCP) region. The right-bottom image  
36 shows traces of pMLC and ZO1 expression. **e.** Quantification of PCP with angular analysis of  
37 pMLC linearity (left) and ZO1 linearity (right). To measure the angles of pMLC and ZO1  
38 cables, we selected a line linking two or more cells. Compared to ZO1 cables, the pMLC cables  
39 tend to align laterally. **f.** The ratio of M-L like axis (from 45 to 135 degrees) to A-P like axis  
40 (from 0 to 45 and from 135 to 180 degrees). (Unpaired *t*-test; \*\*P 0.0326, n=5) **g.** SEM images  
41 of hSCOs at different stages of development. Note that the surfaces of the first spheroids were  
42 relatively smooth with strong tight junctions, while NT-stage hSCOs had rough surfaces. All  
43 scale bars, 50  $\mu$ m.

44

45

46

47

48

49

50

51

52

Supplementary Figure 3\_Related to Figure 1.

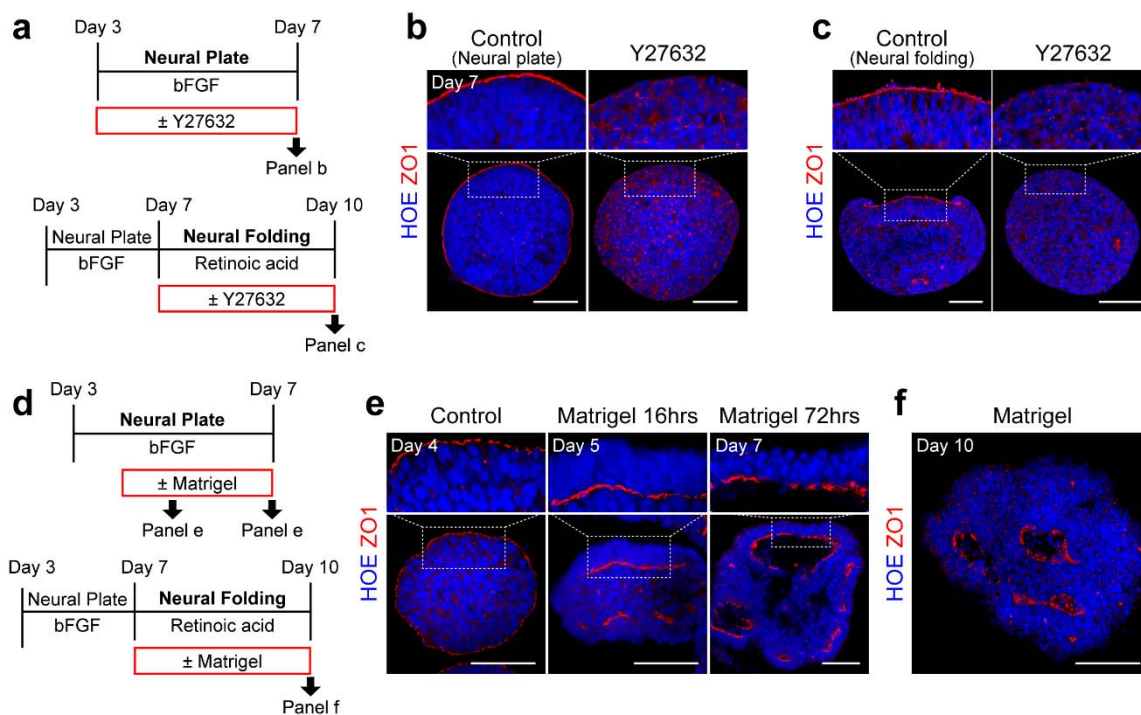

53

54 **Supplementary Fig 3 (related to Fig. 1). Effects of perturbation of apico-basal polarity on**  
55 **neural tube morphogenesis.**

56 **a.** Treatment schemes of Y-27632 (Rock inhibitor; 10  $\mu$ m) for panels (b, top) and (c, bottom).

57 **b.** The effects of Y-27632 on the establishment of neural plate. The apical polarity at neural  
58 plate-stage was visualized with ZO1 (red). Note that the Y-27632 treatments disrupted apical

59 localization of ZO1. **c.** The effects of Y-27632 at the neural folding-stage. The apical polarity  
60 at neural plate-stage was visualized with ZO1 (red). Note that the neural folding was not  
61 induced by the Y-27632 treatments and the organoids exhibited round morphology. **d.**

62 Treatment scheme for Matrigel-embedding experiments on panels (e, top) and (f, bottom). **e.**

63 Matrigel embedding at early the neural plate-stage rapidly reversed the apical polarity, and

64 promoted cavitation (by 72 hr). The apical polarity at neural plate-stages was visualized with  
65 ZO1 (red). **f.** Matrigel embedding at the neural folding-stage also resulted in the ventricle-like  
66 morphogenesis as previously reported with forebrain organoids<sup>1</sup>. The apical polarity at neural  
67 plate-stages was visualized with ZO1 (red). The nuclei were counterstained with Hoechst (blue)  
68 in all panels. All scale bars, 50  $\mu\text{m}$ .

69

70

71

72

73

74

75

76

77

78

79

80

81

Supplementary Figure 4\_Related to Figure 1&3.

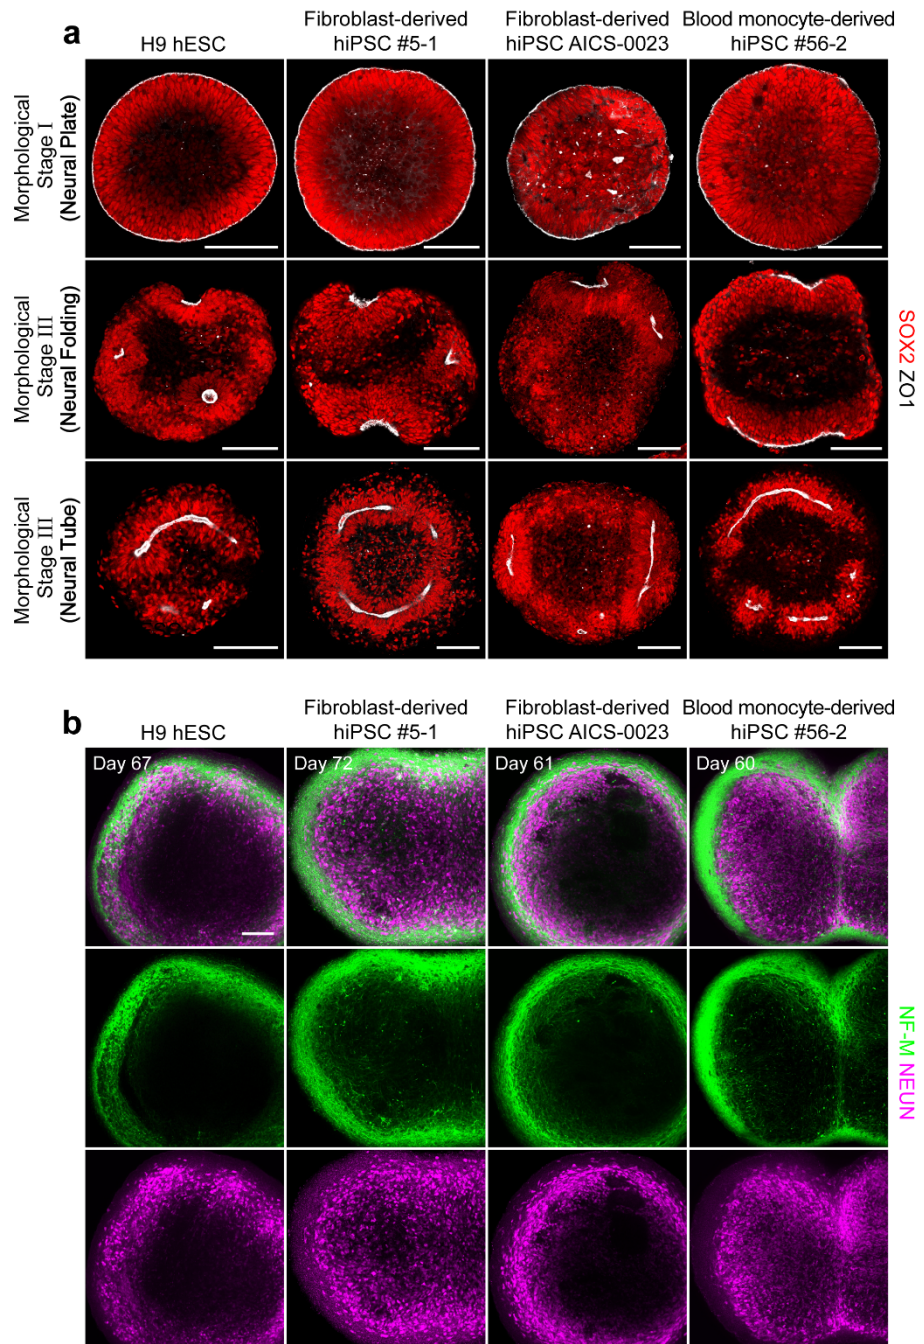

82

83 **Supplementary Fig. 4 (related to Fig. 1, 3). Morphogenesis of hSCOs from various hPSC**

84 **lines**

7

85 **a-b.** Early tube morphogenesis of hSCOs from H9 hESCs (left), two different epidermal  
86 fibroblast-derived hiPSC lines (middle), and peripheral blood monocyte-derived hiPSCs (right).  
87 Each line shows three different stages of neural tube morphogenesis, visualized with staining  
88 for SOX2 (red) and ZO1 (white) **(a)**. Mature morphology of hSCOs from different hPSC lines  
89 consistently exhibited core-to-shell organization of neuronal cell bodies and neurites **(b)**.

90

91

92

93

94

95

96

97

98

99

100

101

102



Supplementary Figure 5\_Related to Figure 2.

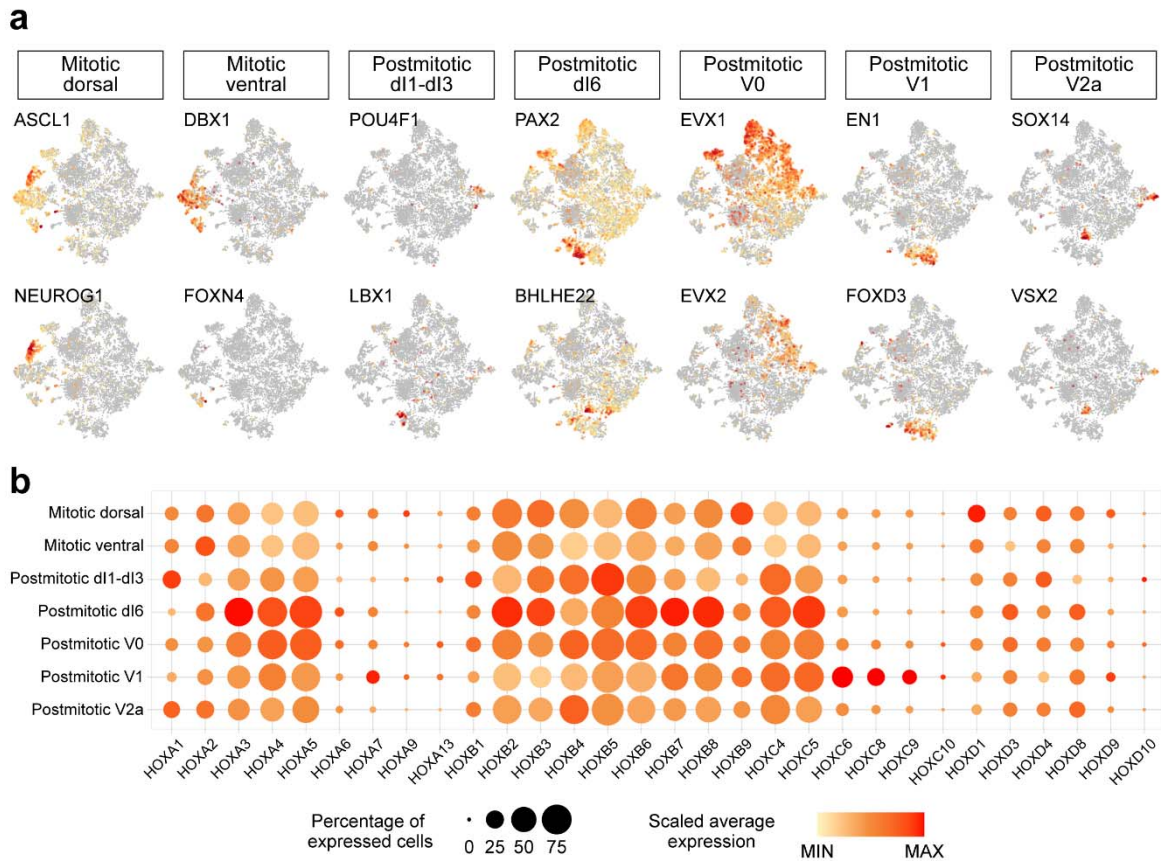

103

104

105 **Supplementary Fig. 5 (related to Fig. 2). Analysis of single-cell RNA sequencing for**  
 106 **dorsoventral and anterior-posterior specifications in 1-month hSCOs**

107 **a.** t-SNE plots showing the clustering of major dorsoventral region-specific gene expression  
 108 levels. **b.** Dot plots showing the expression of HOX genes across the 7 sub-clusters present in  
 109 Figure 2c. All sub-clusters exhibit a similar pattern of HOX genes expression similar to the  
 110 cervical-thoracic identity. Circle size and color represent the percentage of expressed cells and  
 111 the average of gene expression, respectively.

Supplementary Figure 6\_Related to Figure 2.

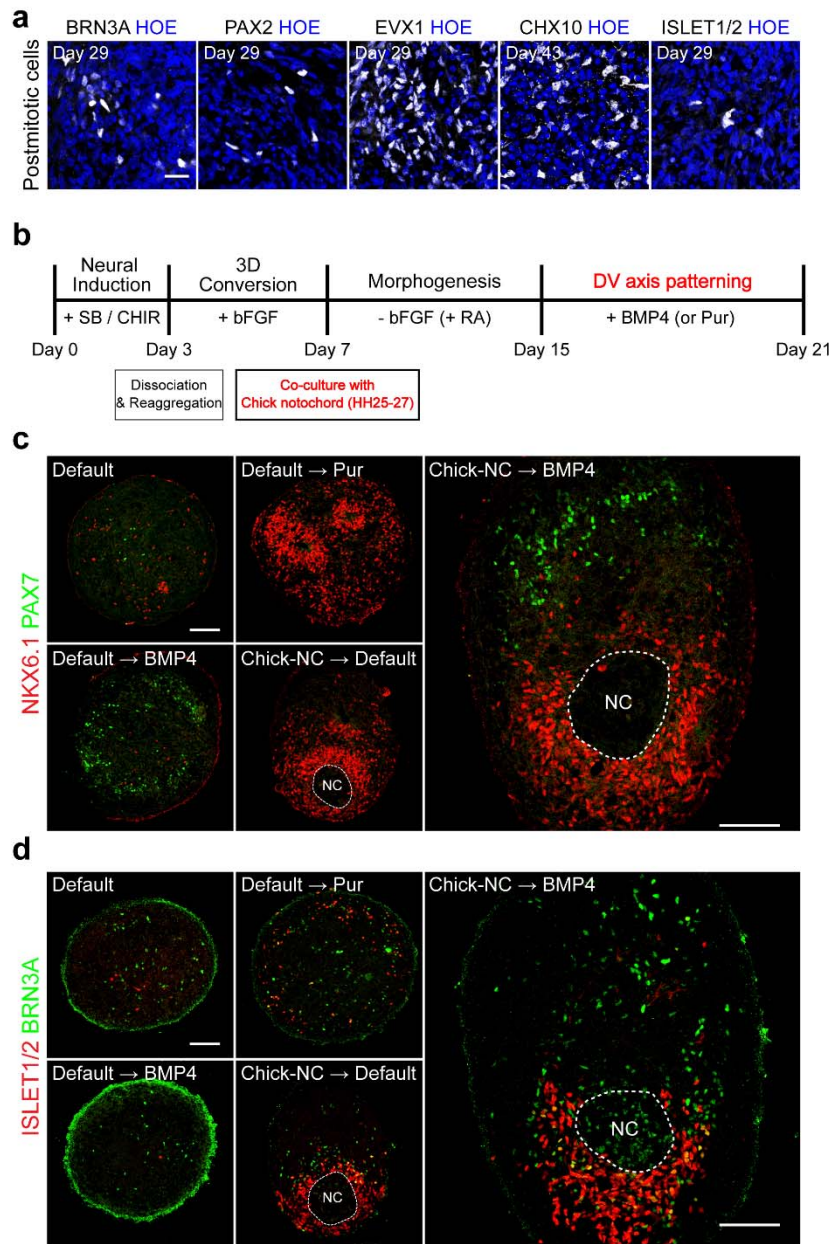

112

113 **Supplementary Fig. 6 (related to Fig. 2). Dorsoventral patterning in hSCOs**

114 **a.** Spinal interneurons in hSCOs. Markers were used for dI 1-3 neurons (POU4F1), dI 4-6 / V0-  
 115 1 neurons (PAX2), V0 neurons (EVX1), V2 neurons (VSX2), and motor neurons (ISLET1/2).

116 Scale bars, 20  $\mu\text{m}$ . Note that these domain-specific markers were rather scattered in the hSCOs.  
117 **b.** Induction of dorsoventral axis by co-culture with chick notochord. Schematics for the co-  
118 culture of hSCOs and chick embryonic notochord. **c-d.** Dorsoventral axis formation within  
119 hSCOs. Control hSCOs did not exhibit overt dorsoventral patterning as revealed either by  
120 NKX6.1 (red) / PAX7 (green) double staining (c) or ISLET1/2 (red) / BRN3A (green) double  
121 staining (d). When hSCOs were treated with SHH agonist Purmophamine (Pur) or BMP4 on  
122 day 15, hSCOs appeared to obtain ventral or dorsal identities, respective. When chick  
123 notochord (Chick-NC) was co-cultured with hSCOs from day 7 (neural plate-stage), notochord  
124 acted as ventralizing center and the adjacent to the notochord area of hSCOs exhibited ventral  
125 marker expressions. Finally, the combination of notochord co-culture and BMP4 treatments  
126 (Chick-NC + BMP4) resulted in the dorsoventral patterning within the hSCOs. NC, notochord.  
127 Scale bars, 100  $\mu\text{m}$

128

129

130

131

132

133

134

Supplementary Figure 7\_Related to Figure 2.

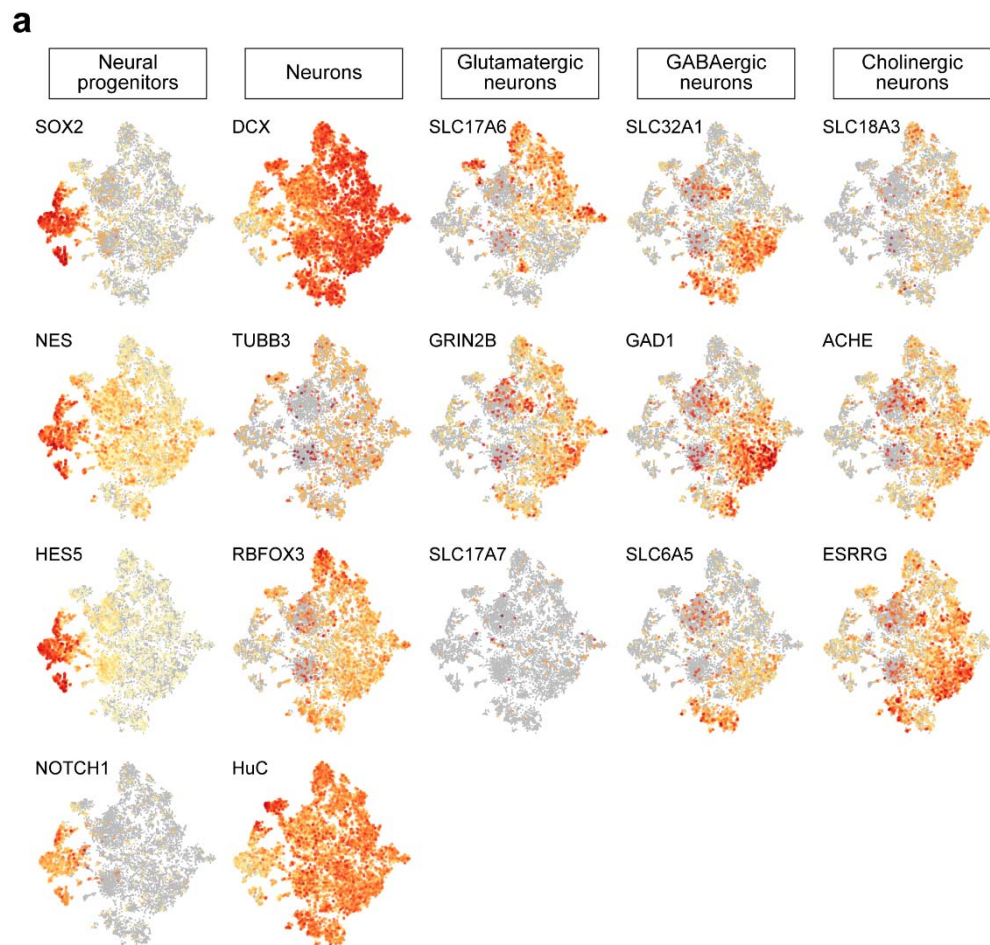

135

136

137 **Supplementary Fig. 7 (related to Fig. 2). Analysis of single-cell RNA sequencing for**

138 **neuronal cell type specification in 1-month hSCOs**

139 **a.** t-SNE plots showing cell-type-specific gene expression levels; neural progenitors,  
140 differentiated neurons, and neuronal subtype defined by neurotransmitters.

141

Supplementary Figure 8\_Related to Figure 3.

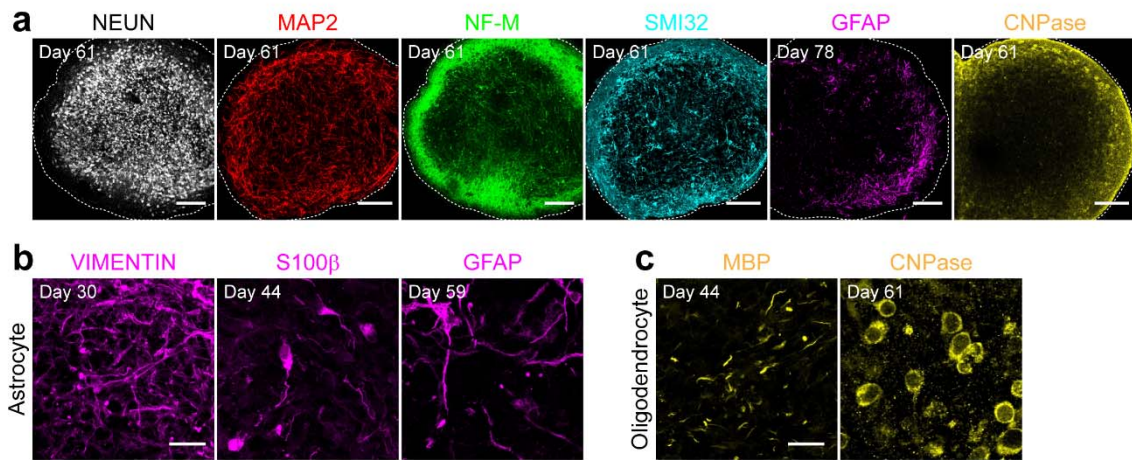

142

143

144 **Supplementary Fig. 8 (related to Fig. 3). Immunostaining of various cell types in hSCOs**  
145 **with prolonged culture**

146 **a.** The core-to-shell organization of hSCOs. Markers were used for neuronal nuclei (NEUN),  
147 dendrites (MAP2), axon (NF-M and SMI32), astrocytes (GFAP), and oligodendrocytes  
148 (CNPase). Scale bar, 200  $\mu$ m. **b-c.** Gliogenesis in hSCOs. Markers were used for immature  
149 (vimentin), intermediate (S100 $\beta$ ), and mature (GFAP) astrocytes (**b**); mature oligodendrocytes,  
150 MBP, and CNPase (**c**). Scale bar, 20  $\mu$ m.

151

152

Supplementary Figure 9\_Related to Figure 3.

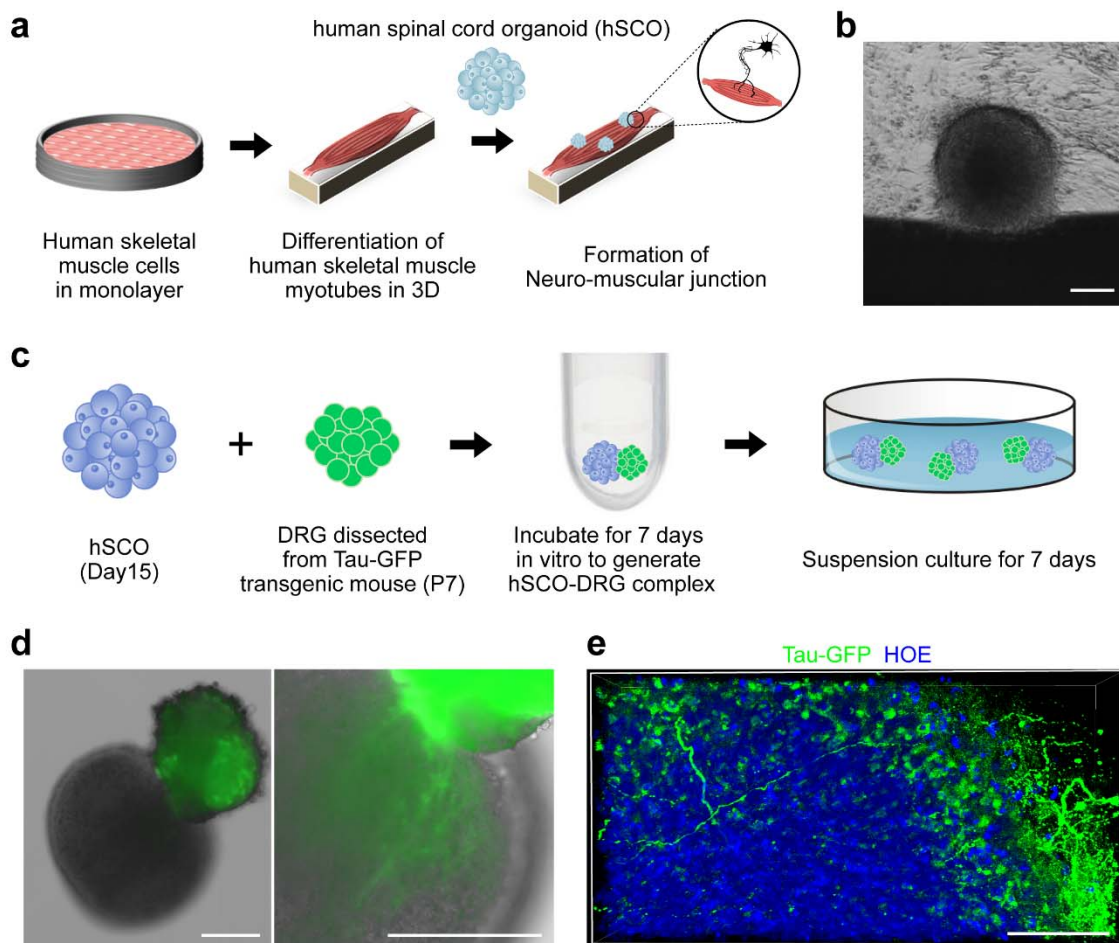

153

154 **Supplementary Fig. 9 (related to Fig. 3). Co-culture of hSCOs with peripheral**  
155 **counterparts**

156 **a.** Schematics for the co-culture of hSCOs and a human myotube. **b.** Brightfield image of  
157 hSCOs attaching to the myotube. Scale bar, 200  $\mu\text{m}$ . **c.** Schematics for the co-culture of hSCOs  
158 and a mouse DRG. The DRG was obtained from P7 Tau-GFP transgenic mice and co-cultured  
159 with day-15 hSCOs in 96-well plates with U-shaped bottom for 7 days. After visual  
160 confirmation of the strong fusion of the hSCOs and DRG, the fused hSCOs were transferred to  
14

161 an uncoated culture dish and subjected to another 7 days of suspension culture. **d.** Brightfield  
162 image of fused hSCOs with DRG (green). The right image shows the robust entry of GFP-  
163 labeled fibers into hSCOs. Scale bar, 200  $\mu\text{m}$ . **e.** High-resolution image of GFP-labeled sensory  
164 fiber into the hSCO territory. Scale bar, 50  $\mu\text{m}$ .

165

166

167

168

169

170

171

172

173

174

175

176

177

Supplementary Figure 10\_Related to Figure 4.

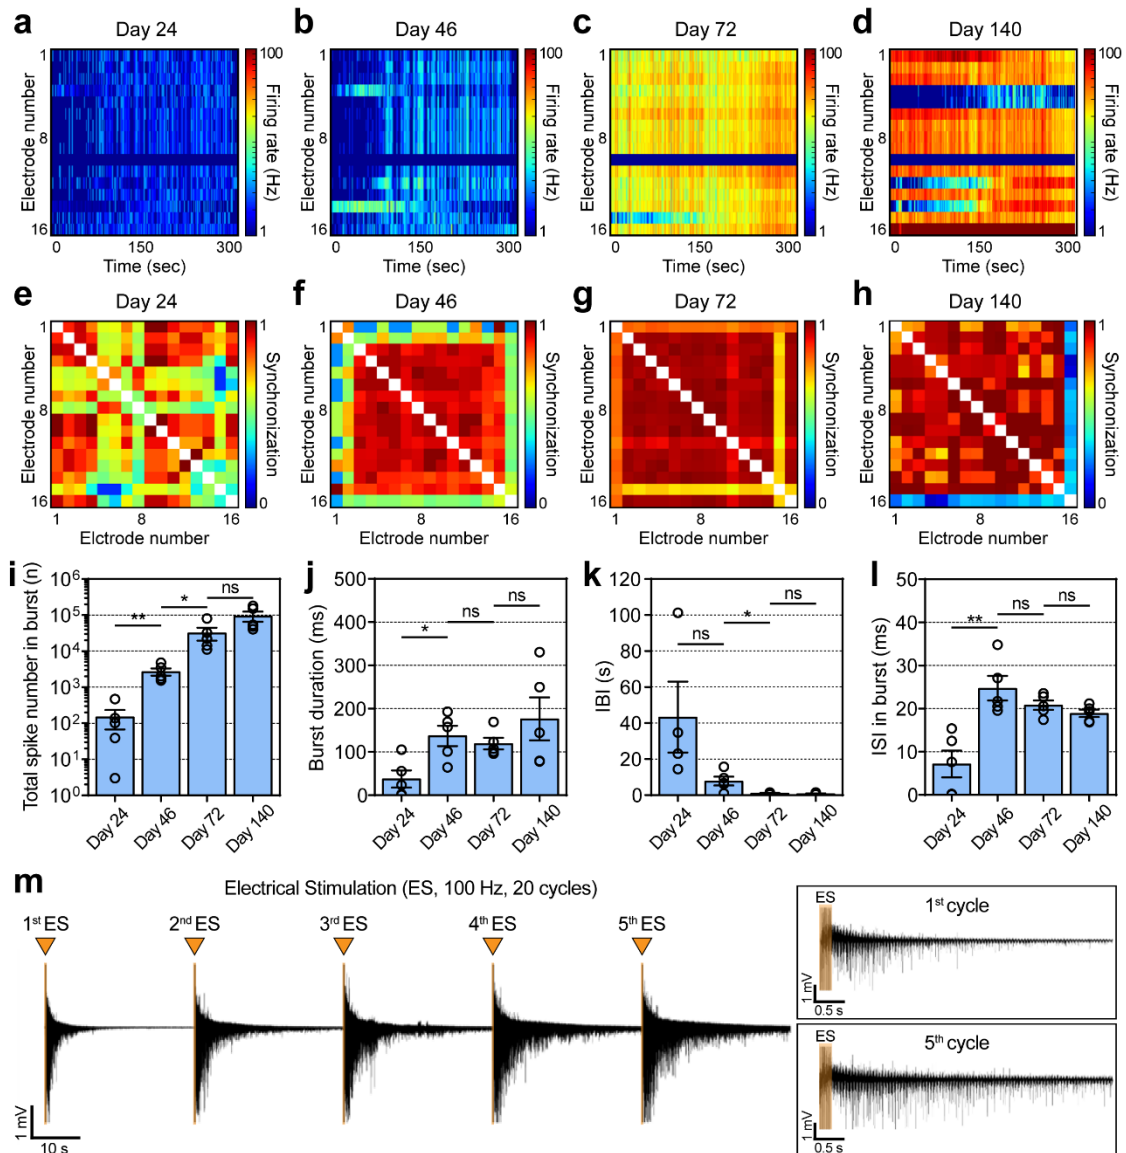

178

179 **Supplementary Fig. 10 (related to Fig. 4). Changes in the patterns of neural activities in**  
 180 **hSCOs**

181 **a-d.** Representative heatmaps showing neural activities at Day 24 (**a**), Day 46 (**b**), Day 72 (**c**),  
 182 and Day 140 (**d**). **e-h.** Representative cross-correlation matrices showing synchronization



183 between signal-recorded electrodes at Day 24 (e), Day 46 (f), Day 72 (g), and Day 140 (h). i-  
184 j. Changes in the patterns of burst activity as the hSCOs mature (error bars indicate s.e.m. n=5).  
185 Total spike number in burst activities (Day 24 – 46: \*\* P 0.0035; Day 46 – 72: \* P 0.0483; Day  
186 72 – 140: ns P 0.0858; n=number of the samples, Two-tailed unpaired *t*-test) (i). Burst duration  
187 (Day 24 – 46: \* P 0.0119; Day 46 – 72: ns P 0.5309; Day 72 – 140: ns P 0.2977; n=number of  
188 the samples, Two-tailed unpaired *t*-test) (j). Inter burst interval (IBI) (Day 24 – 46: ns P 0.0824;  
189 Day 46 – 72: \* P 0.0246; Day 72 – 140: ns P 0.2702; n the number of the samples, Two-tailed  
190 unpaired *t*-test) (k). Inter spike interval (ISI) in burst activities (Day 24 – 46: \*\* P 0.0031; Day  
191 46 – 72: ns P 0.2322; Day 72 – 140: ns P 0.2074; n=number of the samples, Two-tailed unpaired  
192 *t*-test) (l). m. Representative transient plot showing electrically evoked activities in matured  
193 hSCOs and expanded plots of the first and fifth stimulus.

194

195

196

197

198

199

200

201

Supplementary Figure 11\_Related to Figure 5.

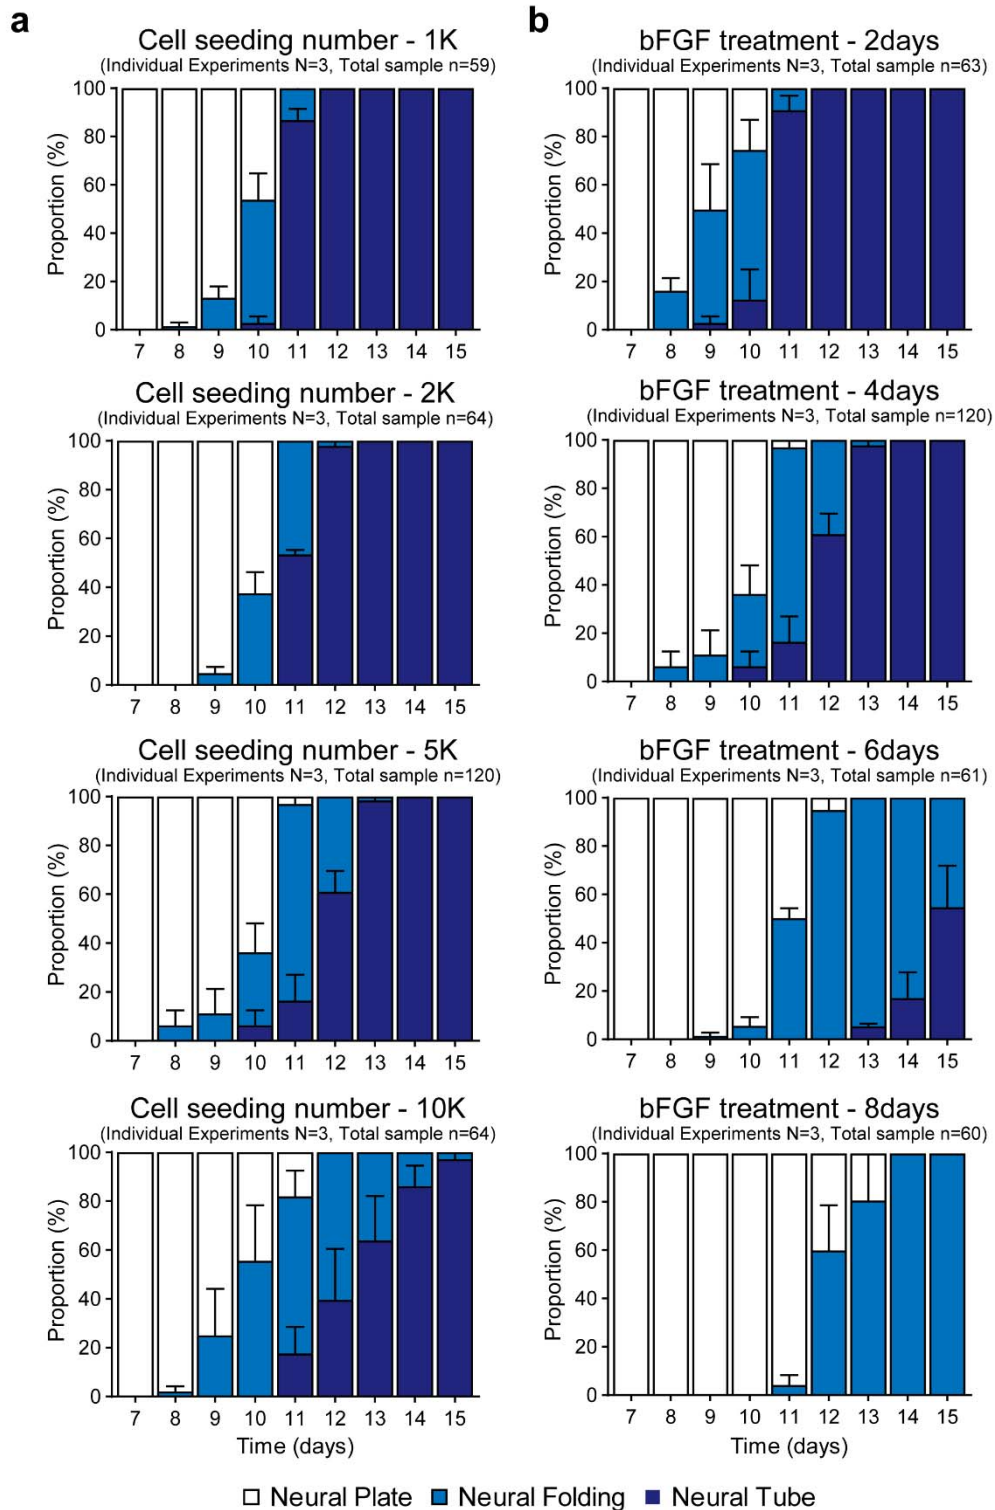

203 **Supplementary Fig. 11 (related to Fig. 5). Size and bFGF duration-dependent**  
204 **morphogenesis in hSCOs**

205 **a.** Quantification of cell seeding number-dependent morphogenesis. The proportion of hSCOs  
206 at indicated morphological stages (white, neural plate stage; blue, neural folding stage; navy,  
207 neural tube stage) at the indicated culture time. The hSCOs with increasing numbers of initial  
208 cell seeding spent longer time to complete tube morphogenesis. **b.** Quantification of bFGF  
209 treatment period-dependent morphogenesis. Data are expressed as mean  $\pm$  S.E.M of three  
210 independent experiments. Total number of organoids analyzed in each group is shown on the  
211 top of each graph.

212

213

214

215

216

217

218

219

220

221 **Supplementary Tables**

222

223 **Supplementary Table S1. Antibodies used for immunohistochemistry**

| <b>Antigen</b>     | <b>Host Species</b> | <b>Source</b>  | <b>Cat#</b> | <b>Dilution (3D)</b> | <b>Dilution (2D)</b> |
|--------------------|---------------------|----------------|-------------|----------------------|----------------------|
| SOX2               | Rabbit              | Millipore      | AB5603      | 1:300                | 1:500                |
| SOX2               | Mouse               | Santa Cruz     | sc-365823   | 2.5:300              | 1:200                |
| SOX2               | Goat                | Santa Cruz     | sc-17320    | 2:300                | 1:250                |
| ZO1                | Rabbit              | Invitrogen     | 61-7300     | 2.5:300              | 1:200                |
| ZO1                | Mouse               | Invitrogen     | 33-9100     | 2.5:300              | 1:200                |
| GFP                | Chick               | Abcam          | ab13970     | 1:600                | 1:1000               |
| ZIC2               | Rabbit              | Millipore      | AB15392     | 2.5:300              | 1:200                |
| pMLC               | Rabbit              | Cell signaling | 3671        | 2.5:300              | 1:200                |
| Laminin            | Rabbit              | Sigma          | L9393       | 1:600                | 1:1000               |
| N-cadherin         | Mouse               | BD Biosciences | 610921      | 1:300                | 1:500                |
| a-tubulin          | Mouse               | Santa Cruz     | sc-8035     | 1:300                | 1:500                |
| Occludin           | Rabbit              | Invitrogen     | 71-1500     | 2.5:300              | 1:200                |
| Occludin           | Mouse               | Invitrogen     | 33-1500     | 2.5:300              | 1:200                |
| Phospho-histone H3 | Rabbit              | Upstate        | 06-570      | 1:600                | 1:1000               |
| NeuN               | Rabbit              | Millipore      | ABN78       | 1:600                | 1:1000               |
| NeuN               | Mouse               | Millipore      | MAB377      | 1:300                | 1:500                |
| T                  | Goat                | R&D            | AF2085      | 1:300                | 1:500                |
| OCT4               | Mouse               | Santa Cruz     | sc-5279     | 1:300                | 1:500                |
| E-cadherin         | Rabbit              | Cell signaling | 3195        | 2.5:300              | 1:200                |
| NANOG              | Goat                | R&D            | AF1977      | 2.5:300              | 1:200                |
| FOXA2              | Mouse               | DSHB           | 4C7         | 5:300                | 1:100                |
| Neurofilament-M    | Mouse               | DSHB           | 2H3         | 2:300                | 1:250                |
| GFAP               | Rat                 | Invitrogen     | 13-0300     | 1:300                | 1:500                |
| MBP                | Rabbit              | Abcam          | ab40390     | 1:600                | 1:1000               |
| LHX3               | Mouse               | DSHB           | 67.4E12     | 5:300                | 1:100                |
| CHX10              | Sheep               | Millipore      | AB9016      | 2.5:300              | 1:200                |
| GABA               | Rabbit              | Sigma          | A2502       | 1:600                | 1:1000               |
| vGLUT1             | Guinea pig          | Millipore      | Ab5905      | 2:300                | 1:250                |
| Calbindin          | Mouse               | Swant          | 300         | 1:600                | 1:1000               |
| Calretinin         | Goat                | Swant          | CG1         | 1:300                | 1:500                |
| Parvalbumin        | Rabbit              | Swant          | PV27        | 1:600                | 1:1000               |
| ChaT               | Goat                | Milipore       | AB144p      | 5:300                | 1:100                |

|                                                  |        |                  |               |         |        |
|--------------------------------------------------|--------|------------------|---------------|---------|--------|
| VACHT                                            | Rabbit | Synaptic Systems | 139 103       | 1:300   | 1:500  |
| Synapsin                                         | Rabbit | Abcam            | ab8           | 1:600   | 1:1000 |
| $\beta$ -Tubulin III (Tuj1)                      | Mouse  | Sigma            | T8660         | 1:600   | 1:1000 |
| PSD95                                            | Mouse  | Thermo           | MA1-045       | 2:300   | 1:250  |
| MAP2                                             | Chick  | Millipore        | AB5543        | 1:3000  | 1:5000 |
| SMI32                                            | Mouse  | Covance          | SMI-32P       | 1:600   | 1:1000 |
| CNPase                                           | Mouse  | Sigma            | C5922         | 1:300   | 1:500  |
| Vimentin                                         | Goat   | Millipore        | AB1620        | 1:300   | 1:500  |
| S100 $\beta$                                     | Mouse  | Sigma            | S2532         | 1:300   | 1:500  |
| PAX7                                             | Mouse  | DSHB             | PAX7-s        | 2.5:30  | 1:20   |
| IRX3                                             | Goat   | Santa Cruz       | sc-22581      | 1:30    | 1:50   |
| NKX6.1                                           | Goat   | Santa Cruz       | sc-15027      | 2.5:300 | 1:200  |
| OLIG2                                            | Rabbit | IBL              | JP18953       | 1:300   | 1:500  |
| BRN3A                                            | Goat   | Santa Cruz       | sc-31984      | 1:300   | 1:500  |
| PAX2                                             | Mouse  | DSHB             | PCRP-PAX2-1A7 | 2:30    | 1:25   |
| EVX1                                             | Mouse  | DSHB             | 99.1-3A2      | 2:30    | 1:25   |
| ISLET1.2                                         | Mouse  | DSHB             | 39.4D5        | 2.5:300 | 1:200  |
| Alexa Fluor 488 Phalloidin                       | -      | Thermo           | A12379        | 1:300   | 1:500  |
| Alexa Fluor 647 Phalloidin                       | -      | Thermo           | A22287        | 1:30    | 1:50   |
| Alexa Fluor 594 conjugate $\alpha$ -Bungarotoxin | -      | Invitrogen       | B13423        | 1:300   | 1:500  |

224

225

226

227

228

229

230

231 **Supplementary Table S2. Primer sequences used for RT-PCR**

| Gene         | Primer (Forward)         | Primer (Reverse)          | Size |
|--------------|--------------------------|---------------------------|------|
| OCT4         | CTGGTTCGCTTTCTCTTTTCG    | CTTTGAGGCTCTGCAGCTTA      | 150  |
| NANOG        | AAGGCCTCAGCACCTACCTA     | TGCACCAGGTCTGAGTGTTTC     | 181  |
| MIXL1        | TTTTCTCCCCTCTTCCAGGTA    | TGGGGCTTCAGACATTTTCGT     | 146  |
| SOX2         | GGAAAGTTGGGATCGAACAA     | GCGAACCATCTCTGTGGTCT      | 145  |
| Bra T        | GGGTACTCCCAATCCTATTCTGAC | ACTGACTGGAGCTGGTAGGT      | 148  |
| NKX1.2       | GACCCACAGAAATTCACCCG     | ATCAGGGGTCTCCAGCTGTC      | 138  |
| SOX1         | ACTTTTATTTCTCGGCCCGT     | GGAATGGGAGGACAGGATTT      | 113  |
| PAX6         | TCCGTTGGAAGTGTGGAGT      | TAAGGATGTTGAACGGGCAG      | 146  |
| OTX2         | CCAGACATCTTCATGCGAGAG    | GGCAGGTCTCACTTTGTTTTG     | 147  |
| CDH1 (E-cad) | CGAGAGCTACACGTTACCGG     | GGGTGTCGAGGGAAAAATAGG     | 119  |
| CDH2 (N-cad) | TGCGGTACAGTGTAAGTGGG     | GAAACCGGGCTATCTGCTCG      | 123  |
| GAPDH        | ACAACCTGGTCTCAGTGTAGCCCA | CATCCACTGGTGCTGCCAAGGCTGT | 220  |

232

233

234

235 **Supplementary Table S3. DV axis clusters\_marker gene list**

236

237 **Supplementary Table S4. Neuronal cell type clusters\_marker gene list**

238

239 **Supplementary Table S5. GEE analysis for morphogenesis by 6AEDs**

240

241

242 **Supplementary video legends**

243

244 **Supplementary Video 1. (relate to Fig. 1a). Live imaging of 3D conversion**

245 After induction of caudal neural stem cells, cell colonies were detached from the dish. Within  
246 12 hrs, colonies were converted to 3D spheroids.

247

248 **Supplementary Video 2. (relate to Fig. 1b). Live imaging of the hSCOs exhibiting neural**  
249 **tube closure**

250 Neural folding-stage hSCOs turned to round spheroid morphology as they completed the neural  
251 tube formation-like morphogenesis (Stage II → III).

252

253 **Supplementary Video 3. (relate to Fig. 1c). Time-course images of neurulation-like**  
254 **morphogenesis in hSCOs**

255 Each stage of hSCOs was labeled with ZO1 (white) to visualize the progression of tube-like  
256 structure formation.

257

258 **Supplementary Video 4. (relate to Fig. 1g). Morphology of hinge cells**

259 Individual cell morphology was visualized via mixture of GFP-labeled H9 cells. Apical side  
23

260 was labeled with ZO1 (white), and 3D images were processed with Amira software.

261

262 **Supplementary Video 5. (relate to Fig. 1l). 3D architecture of neural tube-stage hSCO.**

263 hSCOs were labeled with SOX2 (green), p-H3 (red), and ZO1 (white). Nuclei were  
264 counterstained with Hoechst (blue).

265

266 **Supplementary Video 6. (relate to Fig. 3a). Core-to-shell organization of hSCOs**

267 3-month hSCOs were labeled with NF-M (green), NEUN (magenta) and GFAP (cyan).

268

269 **Supplementary Video 7. (relate to Fig. 6e). 3D neural tube morphology in 6 AEDs-treated**

270 **hSCOs**

271 3D neural tube morphology was labeled with ZO1 staining after treatments with six different  
272 AEDs.

273
